# Supplementary material for: Transcriptome Analysis of Peritoneal Cells Reveals the Early Immune Response of Flounder (Paralichthys olivaceus) to Inactivated Vibrio anguillarum Immunization
Source: MDPI journal article supplement (doi:10.3390/vaccines11101603), 2023-10-16
Supplement: s1 [file s1]

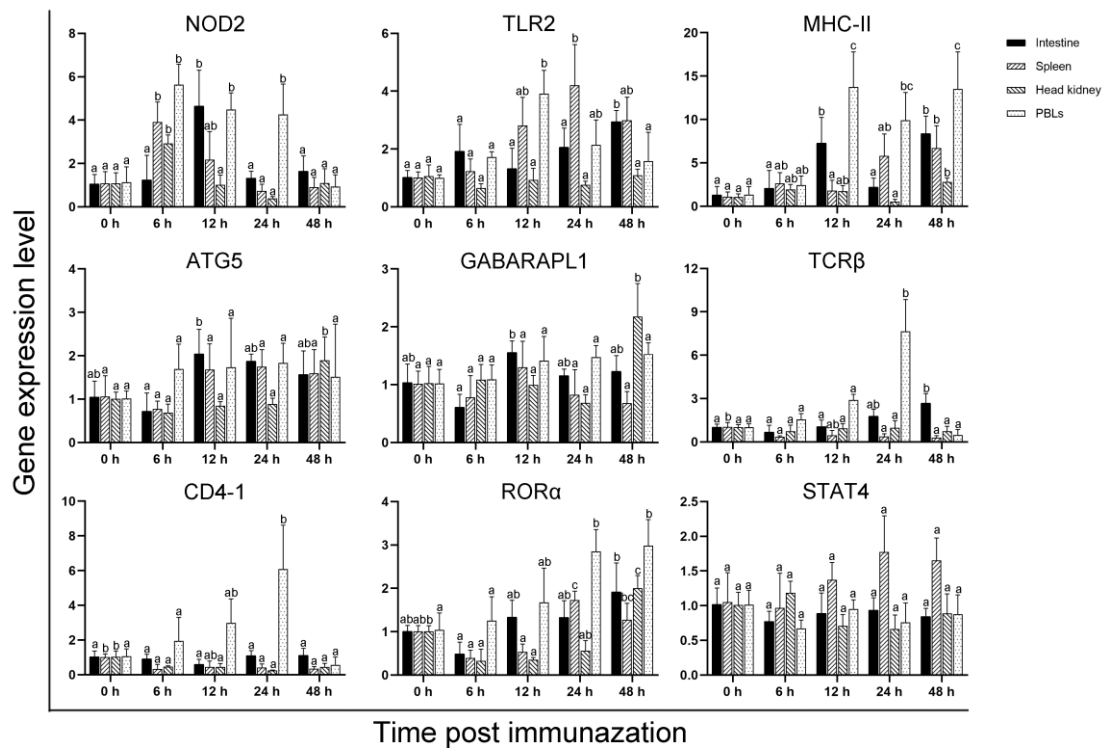

**Figure S1.** Expression of Th cell differentiation related genes in intestine, spleen, head kidney and peripheral blood leukocytes (PBLs) after inactivated *Vibrio anguillarum* immunization. Results are shown as means  $\pm$  SD (N = 3). Different letters on the bar represent the statistical significance ( $P < 0.05$ ) of difference between the experimental (6, 12, 24 and 48 hours after immunization) and control groups (0 hour after immunization).
